# Supplementary material for: Trends in dispensing oral emergency contraceptives and safety issues: a survey of German community pharmacists
Source: Springer Nature journal article supplement (doi:10.1007/s11096-019-00911-6), 2019-09-28
Supplement: MOESM1 [file 17219502]

International Journal of Clinical Pharmacy

**Trends in dispensing oral emergency contraceptives and safety issues - a survey of German community pharmacists**

André Said <sup>a,\*</sup>, Matthias Ganso <sup>a</sup>, Leonard Freudewald <sup>a</sup>, Martin Schulz <sup>a, b</sup>

Authors' details:

André Said, RPh, PhD

A.Said@arzneimittelkommission.de

Matthias Ganso, RPh, PhD

M.Ganso@arzneimittelkommission.de

Leonard Freudewald, RPh

L.Freudewald@arzneimittelkommission.de

Prof. Martin Schulz, RPh, PhD, FFIP, FESCP

M.Schulz@arzneimittelkommission.de

Author affiliations:

<sup>a</sup> Drug Commission of German Pharmacists (AMK), Heidestr. 7, 10557 Berlin, Germany

<sup>b</sup> Institute of Pharmacy, Freie Universität Berlin, Berlin, Germany

**\*Corresponding author:** Dr. André Said,

Drug Commission of German Pharmacists (AMK),

Heidestr. 7, 10557 Berlin, Germany;

Phone: +49 30 40004-552,

Email: A.Said@arzneimittelkommission.de

ORCID AS: 0000-0002-7063-2025

ORCID MS: 0000-0002-5876-7322

## Supplementary material 1

**Table S1**

Available characteristics of the AMK reference pharmacy network

|                                                         | <b>Total number</b> | <b>Respondents</b> |
|---------------------------------------------------------|---------------------|--------------------|
| <b>Gender (person of contact<sup>1</sup>)</b>           | <b>n, (%)</b>       | <b>n, (%)</b>      |
| Female                                                  | 267 (31.1)          | 187 (33.7)         |
| Male                                                    | 333 (38.7)          | 209 (37.7)         |
| Unknown                                                 | 260 (30.2)          | 159 (28.7)         |
| <b>Degree of urbanization (inhabitants<sup>2</sup>)</b> | <b>n, (%)</b>       | <b>n, (%)</b>      |
| > 100,000                                               | 282 (32.8)          | 167 (30.1)         |
| > 20,000 – 100,000                                      | 309 (35.9)          | 204 (36.8)         |
| 5,000 – 20,000                                          | 204 (23.7)          | 135 (24.3)         |
| < 5,000                                                 | 65 (7.6)            | 49 (8.8)           |
| <b>Sum</b>                                              | <b>860</b>          | <b>555 (64.5%)</b> |

<sup>1</sup>) Person of contact: Gender was evaluated by the personal form of address (Mr./Mrs.), if provided by the reference pharmacy. No further identifying information was collected.

2) Number of inhabitants: representing the degree of urbanisation of the geographical location of the reference pharmacy. Population figures were collected from respective regional state offices for statistics and as of December 2016.

**Table S2**

Allocation of AMK reference pharmacies, defined by the 17 State Chambers of Pharmacists in Germany

| <b>State Chamber</b>              | <b>Total</b> | <b>Respondents</b>     |
|-----------------------------------|--------------|------------------------|
|                                   | <b>n</b>     | <b>n, (% of total)</b> |
| Baden-<br>Wuerttemberg            | 70           | 51 (72.9)              |
| Bavaria                           | 67           | 48 (71.6)              |
| Berlin                            | 25           | 16 (64.0)              |
| Brandenburg                       | 19           | 13 (68.4)              |
| Bremen                            | 4            | 2 (50.0)               |
| Hamburg                           | 12           | 6 (50.0)               |
| Hesse                             | 33           | 23 (69.7)              |
| Mecklenburg-<br>Western Pomerania | 33           | 18 (54.6)              |

|                      |            |                   |
|----------------------|------------|-------------------|
| Lower Saxony         | 48         | 31 (64.6)         |
| North Rhine          | 75         | 35 (46.7)         |
| Rhineland-Palatinate | 45         | 24 (53.3)         |
| Saarland             | 12         | 9 (75.0)          |
| Saxony               | 30         | 22 (73.3)         |
| Saxony-Anhalt        | 19         | 14 (73.7)         |
| Schleswig-Holstein   | 19         | 13 (68.4)         |
| Thuringia            | 26         | 20 (76.9)         |
| Westphalia-Lippe     | 323        | 210 (65.0)        |
| <b>Sum</b>           | <b>860</b> | <b>555 (64.5)</b> |
