# Supplementary material for: Trends in dispensing oral emergency contraceptives and safety issues: a survey of German community pharmacists
Source: Springer Nature journal article supplement (doi:10.1007/s11096-019-00911-6), 2019-09-28
Supplement: MOESM2 [file 17219502]

International Journal of Clinical Pharmacy

**Trends in dispensing oral emergency contraceptives and safety issues - a survey of German community pharmacists**

André Said <sup>a,\*</sup>, Matthias Ganso <sup>a</sup>, Leonard Freudewald <sup>a</sup>, Martin Schulz <sup>a, b</sup>

Authors' details:

André Said, RPh, PhD

A.Said@arzneimittelkommission.de

Matthias Ganso, RPh, PhD

M.Ganso@arzneimittelkommission.de

Leonard Freudewald, RPh

L.Freudewald@arzneimittelkommission.de

Prof. Martin Schulz, RPh, PhD, FFIP, FESCP

M.Schulz@arzneimittelkommission.de

Author affiliations:

<sup>a</sup> Drug Commission of German Pharmacists (AMK), Heidestr. 7, 10557 Berlin, Germany

<sup>b</sup> Institute of Pharmacy, Freie Universität Berlin, Berlin, Germany

**\*Corresponding author:** Dr. André Said,

Drug Commission of German Pharmacists (AMK),

Heidestr. 7, 10557 Berlin, Germany;

Phone: +49 30 40004-552,

Email: A.Said@arzneimittelkommission.de

ORCID AS: 0000-0002-7063-2025

ORCID MS: 0000-0002-5876-7322

## **Supplementary material 2:**

Original questionnaire (in German and English translation) consisting of eleven questions, provided via email using the Survey Monkey online tool.

## 1. Frage

**Wie häufig wurden orale Notfallkontrazeptiva („Pille danach“) in Ihrer Apotheke in den letzten drei Monaten (schätzungsweise) abgegeben?**

**(Angabe in Anzahl der abgegebenen Packungen)**

- Nie
- ≤ 5 Packungen
- 6 – 10
- 11 – 15
- 16 – 20
- > 20 Packungen

---

## 1. Question

**How often were oral EC approximately dispensed in your pharmacy (within the last three months)?**

**(Amount of dispensed packages)**

- Never
- ≤ 5 packages
- 6 – 10
- 11 – 15
- 16 – 20

□ > 20 packages

## 2. Frage

**Wie hoch schätzen Sie in Ihrer Apotheke den prozentualen Anteil der Abgabe der „Pille danach“ in den letzten drei Monaten innerhalb der Nacht- und Notdienste gegenüber der Abgabe während der gesetzlichen Ladenöffnungszeiten?**

- Keine Abgabe während der Nacht-und Notdienste
- $\leq 5 \%$
- 6 – 10 %
- 11 – 20 %
- 21 – 30 %
- $> 30 \%$

---

## 2. Question

**What is the estimated percentage of EC dispensing in your pharmacy during night-time and emergency services (within the past three months)?**

- No dispensing during night-time and emergency service
- $\leq 5 \%$
- 6 – 10 %
- 11 – 20 %
- 21 – 30 %
- $> 30 \%$

### **3. Frage**

**Wie viele Tage Notdienst hatten Sie in den letzten drei Monaten?**

Freitext (Angabe in Anzahl der Tage)

---

### **3. Question**

**How many days of night-time and emergency services were performed by your pharmacy (within the past three months)?**

Free-text answer (number of days)

#### **4. Frage**

**Wie hoch schätzen Sie den prozentualen Anteil von abgegebenen Packungen auf Rezept (GKV oder Privat) der „Pille danach“ in Ihrer Apotheke?**

- Keine abgegebenen Packungen auf Rezept (nur Selbstmedikation)
  - $\leq 5\%$
  - 6 – 10 %
  - 11 – 25 %
  - 26 – 50 %
  - $> 50\%$
- 

#### **4. Question**

**What is the estimated percentage of dispensed EC packages on prescription (private or statutory health insurance) in your pharmacy?**

- No EC packages on prescription (only OTC)
- $\leq 5\%$
- 6 – 10 %
- 11 – 25 %
- 26 – 50 %
- $> 50\%$

## 5. Frage

**Wieviel Zeit beansprucht die Beratung zur „Pille danach“ im Durchschnitt in Ihrer Apotheke?**

- ≤ 5 Minuten
- 6 - 10 Minuten
- 11 - 15 Minuten
- > 15 Minuten

---

## 5. Question

**What is the average duration of EC counseling at your pharmacy?**

- ≤ 5 minutes
- 6 - 10 minutes
- 11 - 15 minutes
- > 15 minutes



**6. Frage**

**Bezugnehmend auf die letzten drei Monate, wie lange war schätzungsweise der zeitliche Abstand zwischen dem ungeschützten Geschlechtsverkehr (uGV) und dem Kontakt in Ihrer Apotheke? (Angaben in Prozent)**

**Bitte beachten Sie, dass die prozentuale Summe = 100 % entsprechen muss.**

|                      | <b>0 %</b> | <b>25 %</b> | <b>50 %</b> | <b>75 %</b> | <b>100 %</b> |
|----------------------|------------|-------------|-------------|-------------|--------------|
| <b>&lt; 12 Std.</b>  |            |             |             |             |              |
| <b>12 – 72 Std.</b>  |            |             |             |             |              |
| <b>72 - 120 Std.</b> |            |             |             |             |              |
| <b>&gt; 120 Std.</b> |            |             |             |             |              |

---

**6. Question**

**With respect to the past three months, what was the estimated duration between unprotected sexual intercourse and the consultation of the woman at your pharmacy? (Data as percentage)**

**Please assure that the sum is 100%**

|                  | <b>0 %</b> | <b>25 %</b> | <b>50 %</b> | <b>75 %</b> | <b>100 %</b> |
|------------------|------------|-------------|-------------|-------------|--------------|
| <b>&lt; 12 h</b> |            |             |             |             |              |
| <b>12 – 72 h</b> |            |             |             |             |              |

|                   |  |  |  |  |  |
|-------------------|--|--|--|--|--|
| <b>72 - 120 h</b> |  |  |  |  |  |
| <b>&gt; 120 h</b> |  |  |  |  |  |

## 7. Frage

**Bezugnehmend auf die letzten drei Monate, welche der folgenden Begründungen für den Wunsch nach der „Pille danach“ wurden genannt?**

**Bitte nur zutreffende Aussagen ankreuzen.**

- A. Kondompanne
- B. Pille vergessen
- C. Keine Verhütung angewendet, trotzdem kein Kinderwunsch
- D. Eingeschränkte Wirksamkeit der Pille vermutet (z. B. Erbrechen/Diarrhö)
- E. „Pille danach auf Vorrat“ verlangt
- F. (Potentiell) embryo-/fetotoxisches Risiko aufgrund von Begleit- oder Bedarfsmedikation

|                                  |
|----------------------------------|
| Freitext (Sonstige Begründungen) |
|----------------------------------|

---

## 7. Question

**Regarding the past three months, what were the reasons for requesting EC, stated by women?**

**Please mark the true statements.**

- A. Busted or broken condom
- B. Forgotten use of regular contraception
- C. Unprotected sexual intercourse, but no wish for child
- D. Limited effectiveness of regular oral contraception assumed

E. To have EC in stock

F. (Potential) embryo-/fetotoxic risk due to medication

Free-text answers

## 8. Frage

**Welche Probleme traten in Ihrer Apotheke in den letzten drei Monaten bei der Beratung/der Abgabe rezeptfreier Notfallkontrazeptiva auf?**

**Bitte nur zutreffende Aussagen ankreuzen.**

- A. (Frühere) Nebenwirkungen nach Einnahme oraler Notfallkontrazeptiva wurden berichtet
- B. Die Frau war nicht persönlich vorstellig, sondern wurde durch den Mann oder eine dritte Person vertreten
- C. (Potentielle) Medikationsfehler bei der Anwendung der Pille danach wurden erkannt
- D. Compliance-Probleme der Frau wurden festgestellt (z. B. Sprachbarriere)
- E. Unsicherheiten in der Eigendiagnose durch die Frau bestanden
- F. Forensisch Relevantes (z. B. Verdacht auf Gewaltanwendung) wurde festgestellt

|                                                      |
|------------------------------------------------------|
| Freitext (Sonstige Probleme bei der Beratung/Abgabe) |
|------------------------------------------------------|

---

## 8. Question

**Which problems occurred at your pharmacy when counseling/dispensing EC without prescription (within the past three months)?**

**Please mark the true statements.**

- A. (Former) side effects after use of EC were reported
- B. EC was not requested by the woman concerned but the respective man or a third person

- C. (Potential) medication errors when administering EC were detected
- D. Compliance problems e.g., due to language barriers
- E. Uncertainties in self-diagnosis of the woman
- F. Forensic relevant evidence e.g., suspicion of use of force was detected

Free-text answers

## 9. Frage

**Wenn die „Pille danach“ ohne Rezept verlangt wurde, spielten folgende Faktoren eine Rolle bei der Auswahl des abgegebenen Präparates: Levonorgestrel (LNG) oder Ulipristalacetat (UPA)?**

**Bitte nur zutreffende Aussagen ankreuzen.**

- A. LNG ist nach Ihrer Einschätzung innerhalb der ersten 72 h besser geeignet
- B. UPA ist nach Ihrer Einschätzung besser geeignet
- C. Für LNG liegen mehr Erfahrungen vor
- D. Konkreter Wunsch der Frau aufgrund von Preis, Werbung, Freunde/Familie od. ähnlichem
- E. Konkreter Wunsch der Frau aufgrund bestehender Erfahrungen durch vorherige Einnahme und/oder ärztlicher Verschreibung
- F. (Potentielles) Auftreten relevanter Nebenwirkungen/Unverträglichkeiten bei Einnahme eines Wirkstoffs (Präparates) in der Vergangenheit
- G. Die vergangene Zeit seit dem ungeschützten Geschlechtsverkehr bis zur Vorstellung in der Apotheke
- H. Die Frau stillt
- I. Verfügbarkeit (des abgegebenen Präparates) in der Apotheke
- J. Einkaufskonditionen der Apotheke

|                             |
|-----------------------------|
| Freitext (andere Faktoren): |
|-----------------------------|

---

## 9. Question

**If EC were requested without medical prescription, did the following eligibility criteria play a role for choosing levonorgestrel (LNG) or ulipristal acetate (UPA)?**

**Please mark the true statements.**

- A. LNG is more suitable within 72h
- B. UPA is more suitable
- C. More practical experience exist for LNG
- D. Specific request by the woman relating to pricing, advertisement, or personal advice by family, friends or others
- E. Specific request by the woman due to personal experience and/or medical prescription
- F. Former (potential) occurrence of side effects and/or intolerance
- G. Interval between unprotected sexual intercourse or contraceptive failure and arrival of the woman at pharmacy
- H. The woman is in lactation period
- I. Availability of LNG- or UPA-containing EC at pharmacy
- J. Purchasing conditions of the pharmacy

|                                    |
|------------------------------------|
| Free-text answers (other factors): |
|------------------------------------|



## 10. Frage

**Wie oft hatten Sie bzw. Ihre MitarbeiterInnen (fachliche) Bedenken bezüglich der Abgabe der „Pille danach“ in den letzten drei Monaten? (Angaben in Prozent)**

- Keine (fachlichen) Bedenken geltend gemacht
- $\leq 5\%$
- 6 – 10 %
- 11 – 25 %
- 26 – 50 %
- $> 50\%$

---

## 10. Question

**How often did you, or your employees, declared concerns when dispensing EC (within the past three months)?**

- No (professional) concerns were declared
- $\leq 5\%$
- 6 – 10 %
- 11 – 25 %
- 26 – 50 %
- $> 50\%$

## 11. Frage

Was waren die Gründe hierfür? Wurde Ihrerseits der Besuch einer Gynäkologin/eines Gynäkologen empfohlen?

Bitte nur zutreffende Aussagen ankreuzen.

|            | Ja, Aussage trifft zu. „Pille danach“ <b>nicht</b> abgegeben und an Gynäkologen/Gynäkologin verwiesen | Ja, Aussage trifft zu. „Pille danach“ <b>nicht</b> abgegeben<br><i>(nicht an Gynäkologin/Gynäkologen verwiesen)</i> | Ja, Aussage trifft zu. „Pille danach“ <b>trotzdem</b> abgegeben und an Gynäkologen/Gynäkologin verwiesen | Ja, Aussage trifft zu. „Pille danach“ <b>trotzdem</b> abgegeben<br><i>(nicht an Gynäkologin/Gynäkologen verwiesen)</i> |
|------------|-------------------------------------------------------------------------------------------------------|---------------------------------------------------------------------------------------------------------------------|----------------------------------------------------------------------------------------------------------|------------------------------------------------------------------------------------------------------------------------|
| <b>A-M</b> |                                                                                                       |                                                                                                                     |                                                                                                          |                                                                                                                        |

- A. Die Abgabe sollte auf Wunsch der Frau „auf Vorrat“ erfolgen (keine akute Notfallkontrazeption).
- B. Die Indikation für die „Pille danach“ war fraglich (z. B. wurden kombinierte hormonale Kontrazeptiva regelmäßig eingenommen; diese wurden jedoch einmalig vergessen. Der Zeitpunkt des ungeschützten Geschlechtsverkehrs lag dabei weniger als 12 Std. zurück.).
- C. Der Zeitpunkt des ungeschützten Geschlechtsverkehrs lag mehr als 120 Std. zurück.

- D. Es bestanden akute gesundheitliche Probleme bzw. chronische Vorerkrankungen der Frau (z. B. Malabsorptionssyndrom, schwere Leberfunktionsstörungen, frühere Eileiterentzündung).
- E. Es bestanden potentiell relevante Interaktionen aufgrund der Begleitmedikation (z. B. CYP3A4-Induktoren wie Rifampicin, Barbiturate, Phenytoin).
- F. Anhaltendes Erbrechen/Diarrhö der Frau.
- G. Erneute Anwendung innerhalb desselben Menstruationszyklus.
- H. Eine bestehende Schwangerschaft konnte nicht ausgeschlossen werden.
- I. Es bestanden Bedenken bezüglich sexuell übertragbaren Krankheiten (z. B. Syphilis, HPV etc.).
- J. Eine Einverständniserklärung eines Erziehungsberechtigten bei Mädchen unter 14 Jahren fehlte.
- K. (Massive) Adipositas der Frau wurde festgestellt.
- L. Sie haben persönliche ethische/religiöse Vorbehalte zur Notfallkontrazeption /„Pille danach“.
- M. Der Verdacht auf erfahrene Gewaltanwendung / sexuelle Traumatisierung der Frau bestand.

Freitext (andere Gründe für fachliche Bedenken):

---

## 11. Question

**What were the reasons for the concerns? Was the woman referred to a gynecologist?**

**Please mark the true statements.**

|            |                                                                                                |                                                                                                        |                                                                                                  |                                                                                                          |
|------------|------------------------------------------------------------------------------------------------|--------------------------------------------------------------------------------------------------------|--------------------------------------------------------------------------------------------------|----------------------------------------------------------------------------------------------------------|
|            | <b>Yes, statement is correct. EC were <u>not</u> dispensed and a gynecologist was referred</b> | <b>Yes, statement is correct. EC were <u>not</u> dispensed</b><br><i>(no referral to gynecologist)</i> | <b>Yes, statement is correct. EC were <u>still</u> dispensed and a gynecologist was referred</b> | <b>Yes, statement is correct. EC were <u>still</u> dispensed</b><br><i>(no referral to gynecologist)</i> |
| <b>A-M</b> |                                                                                                |                                                                                                        |                                                                                                  |                                                                                                          |

- A. The woman wanted to have EC in stock (no acute emergency contraception).
- B. Questionable indication for EC (e.g. usual oral contraception was forgotten and unprotected sex dates back less than 12 hrs).
- C. Unprotected sexual intercourse was more than 120 hrs (5 days) ago.
- D. Present acute health problems or chronic diseases of the woman (e.g. malabsorption syndrome, severe hepatic dysfunction, previous tubal inflammation).
- E. (Potential) clinically relevant interactions were apparent due to concurrent medication (e.g. cytochrome 3A4-inducers like rifampicin, barbiturates, or phenytoin).
- F. Sustained vomiting/diarrhea.
- G. Repeated use within the same menstrual cycle.
- H. Suspicion of an existing pregnancy could not be ruled out
- I. Concerns suggesting a risk of sexually transmitted diseases (e.g. syphilis, human papillomavirus).

- J. Girls younger than 14 years without informed consent of a parent or legal guardian.
- K. (Massive) obesity of the woman.
- L. Pharmacist's ethical/religious reservations regarding EC.
- M. Suspicion of use of force/ sexual traumatization.

Free-text answers:
