# Supplementary material for: Trends in dispensing oral emergency contraceptives and safety issues: a survey of German community pharmacists
Source: Springer Nature journal article supplement (doi:10.1007/s11096-019-00911-6), 2019-09-28
Supplement: MOESM3 [file 17219502]

International Journal of Clinical Pharmacy

**Trends in dispensing oral emergency contraceptives and safety issues - a survey of German community pharmacists**

André Said <sup>a,\*</sup>, Matthias Ganso <sup>a</sup>, Leonard Freudewald <sup>a</sup>, Martin Schulz <sup>a, b</sup>

Authors' details:

André Said, RPh, PhD

A.Said@arzneimittelkommission.de

Matthias Ganso, RPh, PhD

M.Ganso@arzneimittelkommission.de

Leonard Freudewald, RPh

L.Freudewald@arzneimittelkommission.de

Prof. Martin Schulz, RPh, PhD, FFIP, FESCP

M.Schulz@arzneimittelkommission.de

Author affiliations:

<sup>a</sup> Drug Commission of German Pharmacists (AMK), Heidestr. 7, 10557 Berlin, Germany

<sup>b</sup> Institute of Pharmacy, Freie Universität Berlin, Berlin, Germany

**\*Corresponding author:** Dr. André Said,

Drug Commission of German Pharmacists (AMK),

Heidestr. 7, 10557 Berlin, Germany;

Phone: +49 30 40004-552,

Email: A.Said@arzneimittelkommission.de

ORCID AS: 0000-0002-7063-2025

ORCID MS: 0000-0002-5876-7322

### Supplementary material 3

**Table S3**

**Estimated ratio of women asking for EC at different time points after unprotected sex**

Percentage of women asking for EC after unprotected sexual intercourse at predefined time points. Pharmacists estimated percentage of women (sum = 100%, 0% not depicted) for each given interval; n=527 responded, with additional 25 invalid answers (sum ≠ 100%).

| <b>Ratio of women asking for EC at different time ranges after unprotected sex</b> |                          |                          |                          |                           |
|------------------------------------------------------------------------------------|--------------------------|--------------------------|--------------------------|---------------------------|
| <b>Time (h)</b>                                                                    | <b>Respondents (n)</b>   |                          |                          |                           |
| <b>&lt;12</b>                                                                      | 177                      | 135                      | 135                      | 17                        |
| <b>12-72</b>                                                                       | 166                      | 156                      | 144                      | 42                        |
| <b>72-120</b>                                                                      | 100                      | 2                        | 1                        | 0                         |
| <b>&gt;120</b>                                                                     | 3                        | 0                        | 0                        | 0                         |
|                                                                                    | <b>25%</b><br>(of women) | <b>50%</b><br>(of women) | <b>75%</b><br>(of women) | <b>100%</b><br>(of women) |
